# Supplementary material for: Economic shocks predict increases in child wasting prevalence
Source: PubMed Central journal article supplement (PMC9021262; doi:10.1038/s41467-022-29755-x), 2022-04-20
Supplement: 41467_2022_29755_MOESM1_ESM.pdf [file 41467_2022_29755_MOESM1_ESM.pdf]

# Supplementary material for “Economic shocks predict increases in child wasting prevalence” by Derek D. Headey and Marie T. Ruel

## CONTENTS

|                                                                                                                                                                                                              |    |
|--------------------------------------------------------------------------------------------------------------------------------------------------------------------------------------------------------------|----|
| Supplementary Table 1: Descriptive statistics for key variables .....                                                                                                                                        | 2  |
| Supplementary Table 2: Wasting prevalence, GNI growth and GDP growth by country and DHS round ..                                                                                                             | 3  |
| Supplementary Table 3: Pooled sample sizes by country .....                                                                                                                                                  | 7  |
| Supplementary Fig. 1: Local polynomial estimates of moderate/severe wasting (WHZ < -2) prevalence against child age for various regions in Asia and sub-Saharan Africa (95% confidence intervals) .....      | 9  |
| Supplementary Fig 2: Histograms of lagged annual changes in GNI and GDP per capita across 171 surveys covering 1990-2018 .....                                                                               | 10 |
| Panel A: Lagged annual changes in GNI growth.....                                                                                                                                                            | 10 |
| Panel B: Lagged annual changes in GDP growth .....                                                                                                                                                           | 10 |
| Supplementary Fig 3: Variation of the elasticity of wasting with respect to GNI growth for different specifications and sample restrictions.....                                                             | 11 |
| Panel A: Any wasting .....                                                                                                                                                                                   | 11 |
| Panel B: Moderate/severe wasting.....                                                                                                                                                                        | 12 |
| Panel C: Severe wasting.....                                                                                                                                                                                 | 13 |
| Supplementary Fig. 4: Variation of the elasticity of wasting with respect to GDP growth for different specifications and sample restrictions.....                                                            | 14 |
| Panel A: Any wasting .....                                                                                                                                                                                   | 14 |
| Panel B: Moderate/severe wasting.....                                                                                                                                                                        | 15 |
| Panel C: Severe wasting.....                                                                                                                                                                                 | 16 |
| Supplementary Table 4: Multivariate linear probability models of wasting risks as a function of lagged GNI growth shocks, with interactions for urban location and female status (children 0-59 months)..... | 17 |
| Supplementary Table 5: Multivariate linear probability models of wasting risks as a function of lagged GDP growth shocks, with interactions for urban location and female status (children 0-59 months)..... | 18 |
| Supplementary Fig. 5: Elasticities of children’s consumption of various foods with respect to GNI growth or GDP growth (90% CIs) .....                                                                       | 19 |
| Panel A: GNI growth .....                                                                                                                                                                                    | 19 |
| Panel B: GDP growth.....                                                                                                                                                                                     | 20 |
| Supplementary Table 6: Associations between moderate/severe wasting and morbidity symptoms, maternal underweight and child minimum dietary diversity .....                                                   | 21 |

Supplementary Table 1: Descriptive statistics for key variables

| Variable                                          | N         | Mean    | Std. Dev. | Min    | Max     |
|---------------------------------------------------|-----------|---------|-----------|--------|---------|
| <u>Nutrition outcomes</u>                         |           |         |           |        |         |
| Any Wasting (WHZ<-1)                              | 1,256,076 | 0.28    | 0.45      | 0.00   | 1.00    |
| Moderate/severe wasting (WHZ<-2)                  | 1,256,076 | 0.11    | 0.31      | 0.00   | 1.00    |
| Severe Wasting (WHZ<-3)                           | 1,256,076 | 0.04    | 0.20      | 0.00   | 1.00    |
| <u>National-level indicators</u>                  |           |         |           |        |         |
| Growth in GDP per capita (%) (UN), lag 1 year     | 171       | 2.61    | 6.18      | -14.48 | 57.66   |
| Growth in GNI per capita (%) (UN), lag 1 year     | 171       | 2.32    | 6.83      | -28.75 | 52.31   |
| Total annual rainfall (mm), lag 1 year            | 171       | 1105.93 | 704.74    | 21.53  | 3342.30 |
| Average temperature (C), lag 1 year               | 171       | 22.56   | 5.44      | 3.79   | 29.32   |
| Battle-related deaths per 100,000 people          | 171       | 0.47    | 2.14      | 0.00   | 24.65   |
| <u>Individual, mother, household indicators</u>   |           |         |           |        |         |
| Household owns no DHS assets                      | 1,256,076 | 0.34    | 0.47      | 0.00   | 1.00    |
| Household owns some (< 5 y) assets                | 1,256,076 | 0.58    | 0.49      | 0.00   | 1.00    |
| Household owns all 5 assets                       | 1,256,076 | 0.07    | 0.25      | 0.00   | 1.00    |
| Mother has 9 or more years of schooling           | 1,256,076 | 0.27    | 0.44      | 0.00   | 1.00    |
| Household has piped water                         | 1,256,076 | 0.40    | 0.49      | 0.00   | 1.00    |
| Household has flush toilet                        | 1,256,076 | 0.30    | 0.46      | 0.00   | 1.00    |
| Child born in medical facility                    | 1,256,076 | 0.60    | 0.49      | 0.00   | 1.00    |
| Mother received 4 or more ANC visits              | 1,256,076 | 0.55    | 0.50      | 0.00   | 1.00    |
| Child received all vaccinations                   | 1,256,076 | 0.47    | 0.50      | 0.00   | 1.00    |
| Teenage mother (at birth)                         | 1,256,076 | 0.18    | 0.38      | 0.00   | 1.00    |
| Mother has 4 or more children                     | 1,256,076 | 0.39    | 0.49      | 0.00   | 1.00    |
| Household is rural                                | 1,256,076 | 0.67    | 0.47      | 0.00   | 1.00    |
| Child is girl                                     | 1,256,076 | 0.49    | 0.50      | 0.00   | 1.00    |
| <u>Wasting mechanisms</u>                         |           |         |           |        |         |
| Child had diarrhea in past 2 weeks                | 1,230,393 | 0.15    | 0.35      | 0.00   | 1.00    |
| Child had fever-only in past 2 weeks              | 1,230,393 | 0.09    | 0.28      | 0.00   | 1.00    |
| Low maternal BMI (<18.5)                          | 884,436   | 0.12    | 0.32      | 0.00   | 1.00    |
| Child meets minimum dietary diversity (MDD)       | 323,014   | 0.32    | 0.47      | 0.00   | 1.00    |
| Starchy staples in past 24 hours                  | 323,014   | 0.72    | 0.45      | 0.00   | 1.00    |
| Legumes/nuts in past 24 hours                     | 323,014   | 0.24    | 0.42      | 0.00   | 1.00    |
| Dairy in past 24 hours                            | 323,014   | 0.42    | 0.49      | 0.00   | 1.00    |
| Flesh foods in past 24 hours                      | 323,014   | 0.34    | 0.48      | 0.00   | 1.00    |
| Eggs in past 24 hours                             | 323,014   | 0.20    | 0.40      | 0.00   | 1.00    |
| Vitamin A-rich fruits/vegetables in past 24 hours | 323,014   | 0.43    | 0.49      | 0.00   | 1.00    |
| Other fruits/vegetables in past 24 hours          | 323,014   | 0.27    | 0.44      | 0.00   | 1.00    |

$N = 1,256,076$  children for the main DHS variables of interest,  $N = 171$  country-level growth shocks and other shocks, and  $N = 1,230,393$  for child diarrhea and fever-only in the past 2 weeks,  $N = 884,436$  for Low maternal BMI, and  $N = 323,014$  for child dietary data. GDP=Gross Domestic Product and GNI=Gross National Income. WHZ=Weight for height Z score. BMI equals Body Mass Index. ANC equals antenatal care.

Supplementary Table 2: Wasting prevalence, GNI growth and GDP growth by country and DHS round

| Country        | Survey year(s) | Any wasting (WHZ<-1) | Moderate/severe wasting (WHZ<-2) | Severe wasting (WHZ<-3) | GNI growth (lag 1 year) | GDP growth (lag 1 year) |
|----------------|----------------|----------------------|----------------------------------|-------------------------|-------------------------|-------------------------|
| Albania        | 2008-2009      | 9.9%                 | 17.9%                            | 5.8%                    | 6.4%                    | 8.0%                    |
| Albania        | 2017-2018      | 2.2%                 | 7.6%                             | 0.8%                    | 3.6%                    | 3.5%                    |
| Armenia        | 2000-2000      | 2.3%                 | 7.2%                             | 0.7%                    | 3.8%                    | 3.9%                    |
| Armenia        | 2005-2005      | 5.3%                 | 12.6%                            | 2.7%                    | 15.7%                   | 11.1%                   |
| Armenia        | 2010-2010      | 4.3%                 | 11.6%                            | 2.0%                    | -15.3%                  | -13.6%                  |
| Armenia        | 2015-2016      | 5.2%                 | 11.1%                            | 2.1%                    | 2.2%                    | 2.9%                    |
| Bangladesh     | 1996-1997      | 21.3%                | 48.4%                            | 7.8%                    | 2.5%                    | 2.6%                    |
| Bangladesh     | 1999-2000      | 12.7%                | 44.1%                            | 2.8%                    | 3.0%                    | 2.9%                    |
| Bangladesh     | 2004-2004      | 14.7%                | 46.5%                            | 3.7%                    | 4.4%                    | 3.4%                    |
| Bangladesh     | 2007-2007      | 17.3%                | 52.0%                            | 3.5%                    | 5.7%                    | 5.2%                    |
| Bangladesh     | 2011-2011      | 15.9%                | 48.4%                            | 4.3%                    | 4.6%                    | 4.4%                    |
| Bangladesh     | 2014-2014      | 15.8%                | 44.8%                            | 4.3%                    | 4.4%                    | 4.8%                    |
| Benin          | 2001-2001      | 10.2%                | 26.8%                            | 3.9%                    | 2.7%                    | 2.7%                    |
| Benin          | 2006-2006      | 9.1%                 | 23.0%                            | 3.7%                    | -0.8%                   | -1.2%                   |
| Benin          | 2011-2012      | 17.6%                | 29.9%                            | 10.1%                   | 0.4%                    | 0.1%                    |
| Benin          | 2017-2018      | 5.2%                 | 23.3%                            | 1.2%                    | 2.6%                    | 2.6%                    |
| Bolivia        | 1998-1998      | 2.0%                 | 6.5%                             | 0.9%                    | 3.5%                    | 2.9%                    |
| Bolivia        | 2003-2003      | 2.2%                 | 6.8%                             | 1.0%                    | 0.4%                    | 0.6%                    |
| Bolivia        | 2008-2008      | 1.7%                 | 6.2%                             | 0.7%                    | 5.6%                    | 2.8%                    |
| Burkina Faso   | 1993-1993      | 14.9%                | 36.3%                            | 5.9%                    | -1.0%                   | -0.9%                   |
| Burkina Faso   | 1998-1999      | 15.8%                | 37.4%                            | 6.0%                    | 3.9%                    | 4.1%                    |
| Burkina Faso   | 2003-2003      | 24.2%                | 43.4%                            | 12.7%                   | 1.6%                    | 1.4%                    |
| Burkina Faso   | 2010-2010      | 16.0%                | 37.6%                            | 6.5%                    | -1.0%                   | -0.1%                   |
| Burundi        | 2010-2010      | 6.3%                 | 23.0%                            | 1.8%                    | -0.1%                   | 0.5%                    |
| Burundi        | 2016-2017      | 5.1%                 | 23.4%                            | 0.9%                    | -4.1%                   | -2.1%                   |
| Cambodia       | 2000-2000      | 17.8%                | 41.7%                            | 8.5%                    | 8.0%                    | 9.2%                    |
| Cambodia       | 2005-2005      | 8.7%                 | 35.1%                            | 1.7%                    | 9.9%                    | 9.6%                    |
| Cambodia       | 2010-2010      | 12.1%                | 36.8%                            | 3.9%                    | -1.5%                   | -1.3%                   |
| Cambodia       | 2014-2014      | 10.2%                | 36.0%                            | 3.3%                    | 6.7%                    | 5.7%                    |
| Cameroon       | 2004-2004      | 6.2%                 | 16.8%                            | 2.4%                    | 4.6%                    | 1.8%                    |
| Cameroon       | 2011-2011      | 5.8%                 | 17.7%                            | 2.0%                    | 3.7%                    | 0.6%                    |
| Chad           | 2004-2004      | 18.6%                | 40.5%                            | 8.4%                    | -5.6%                   | 10.0%                   |
| Chad           | 2014-2015      | 15.3%                | 38.2%                            | 5.3%                    | -3.3%                   | -2.9%                   |
| Colombia       | 1995-1995      | 1.8%                 | 10.2%                            | 0.6%                    | 5.9%                    | 3.2%                    |
| Colombia       | 2000-2000      | 1.3%                 | 7.5%                             | 0.5%                    | -5.8%                   | -5.8%                   |
| Colombia       | 2005-2005      | 2.2%                 | 11.8%                            | 0.7%                    | 2.8%                    | 3.5%                    |
| Colombia       | 2010-2010      | 1.2%                 | 8.6%                             | 0.3%                    | 0.6%                    | 0.3%                    |
| Congo Rep.     | 2005-2005      | 8.5%                 | 21.5%                            | 4.0%                    | -7.3%                   | 0.5%                    |
| Congo Rep.     | 2011-2012      | 5.7%                 | 22.1%                            | 1.9%                    | 12.4%                   | 9.5%                    |
| Congo DRC      | 2007-2007      | 11.1%                | 27.0%                            | 5.7%                    | -0.8%                   | 2.0%                    |
| Congo DRC      | 2013-2014      | 8.8%                 | 25.0%                            | 3.6%                    | 3.1%                    | 3.9%                    |
| Cote d'Ivoire  | 1998-1999      | 6.7%                 | 22.4%                            | 2.3%                    | 4.1%                    | 2.2%                    |
| Cote d'Ivoire  | 2011-2012      | 7.4%                 | 23.1%                            | 2.1%                    | -6.1%                   | -6.0%                   |
| Dominican Rep. | 1996-1996      | 2.3%                 | 11.5%                            | 0.7%                    | 5.0%                    | 3.7%                    |
| Dominican Rep. | 2002-2002      | 2.3%                 | 10.5%                            | 0.9%                    | 0.3%                    | 0.3%                    |
| Dominican Rep. | 2007-2007      | 2.2%                 | 10.2%                            | 0.8%                    | 9.7%                    | 9.2%                    |
| Dominican Rep. | 2013-2013      | 2.6%                 | 12.6%                            | 0.8%                    | 1.4%                    | 1.5%                    |
| Egypt          | 1992-1992      | 4.2%                 | 9.9%                             | 2.0%                    | 4.6%                    | 3.0%                    |
| Egypt          | 1995-1995      | 6.4%                 | 14.2%                            | 3.0%                    | 2.9%                    | 1.9%                    |
| Egypt          | 2000-2000      | 3.2%                 | 8.2%                             | 1.6%                    | 4.0%                    | 4.0%                    |

|            |           |       |       |      |        |        |
|------------|-----------|-------|-------|------|--------|--------|
| Egypt      | 2003-2003 | 5.1%  | 16.4% | 1.9% | 0.5%   | 1.3%   |
| Egypt      | 2005-2005 | 5.7%  | 13.2% | 2.7% | 2.1%   | 2.2%   |
| Egypt      | 2008-2008 | 8.3%  | 16.0% | 4.4% | 7.7%   | 5.2%   |
| Egypt      | 2014-2014 | 13.0% | 23.1% | 7.6% | -0.8%  | -0.1%  |
| Ethiopia   | 2000-2000 | 14.3% | 38.6% | 4.9% | -10.4% | -10.4% |
| Ethiopia   | 2005-2005 | 13.7% | 34.6% | 5.7% | 10.4%  | 10.0%  |
| Ethiopia   | 2011-2011 | 12.2% | 36.0% | 3.6% | -1.3%  | -1.4%  |
| Ethiopia   | 2016-2016 | 12.4% | 35.6% | 3.7% | 7.2%   | 7.4%   |
| Gabon      | 2000-2000 | 4.5%  | 15.1% | 1.7% | -28.5% | -12.7% |
| Gabon      | 2012-2012 | 4.6%  | 15.8% | 1.8% | 10.6%  | 3.2%   |
| Ghana      | 1998-1998 | 10.3% | 31.0% | 2.9% | 1.8%   | 1.9%   |
| Ghana      | 2003-2003 | 9.6%  | 26.2% | 3.4% | 2.2%   | 2.3%   |
| Ghana      | 2008-2008 | 10.1% | 28.9% | 3.6% | 1.8%   | 1.7%   |
| Ghana      | 2014-2014 | 5.1%  | 24.1% | 1.1% | 8.1%   | 4.8%   |
| Guatemala  | 1995-1995 | 4.3%  | 13.2% | 1.8% | 1.8%   | 1.6%   |
| Guatemala  | 1998-1999 | 3.0%  | 10.1% | 1.4% | 2.9%   | 2.4%   |
| Guatemala  | 2014-2015 | 0.7%  | 7.1%  | 0.1% | 1.8%   | 1.9%   |
| Guinea     | 1999-1999 | 10.5% | 28.0% | 4.8% | 1.5%   | 1.9%   |
| Guinea     | 2005-2005 | 11.5% | 27.7% | 4.7% | -0.1%  | 0.3%   |
| Guinea     | 2012-2012 | 11.4% | 29.1% | 5.3% | 5.0%   | 3.3%   |
| Guinea     | 2018-2018 | 9.4%  | 25.7% | 4.1% | 10.2%  | 10.3%  |
| Haiti      | 2000-2000 | 6.2%  | 20.4% | 2.1% | 0.7%   | 0.9%   |
| Haiti      | 2005-2006 | 9.6%  | 23.4% | 3.7% | -1.4%  | -2.0%  |
| Haiti      | 2012-2012 | 5.4%  | 21.0% | 1.7% | 4.1%   | 3.9%   |
| Haiti      | 2016-2017 | 3.8%  | 16.4% | 1.0% | 0.2%   | 0.1%   |
| Honduras   | 2005-2006 | 1.5%  | 8.5%  | 0.4% | 3.8%   | 3.6%   |
| Honduras   | 2011-2012 | 1.5%  | 9.2%  | 0.3% | 0.1%   | 1.8%   |
| India      | 2005-2006 | 19.3% | 46.4% | 7.4% | 6.2%   | 6.2%   |
| India      | 2015-2016 | 21.2% | 47.9% | 8.8% | 6.5%   | 6.5%   |
| Jordan     | 1990-1990 | 4.5%  | 12.9% | 1.8% | -18.2% | -14.5% |
| Jordan     | 1997-1997 | 2.4%  | 11.7% | 0.6% | -0.8%  | -1.0%  |
| Jordan     | 2002-2002 | 2.5%  | 12.0% | 0.8% | 4.0%   | 3.4%   |
| Jordan     | 2012-2012 | 2.4%  | 10.7% | 0.9% | -2.7%  | -2.6%  |
| Kazakhstan | 1995-1995 | 6.5%  | 16.4% | 2.0% | -11.9% | -11.7% |
| Kazakhstan | 1999-1999 | 3.0%  | 12.3% | 1.2% | -0.4%  | -0.5%  |
| Kenya      | 1993-1993 | 7.5%  | 22.1% | 2.9% | -3.1%  | -3.9%  |
| Kenya      | 1998-1998 | 8.8%  | 23.6% | 4.1% | -2.5%  | -2.5%  |
| Kenya      | 2003-2003 | 7.4%  | 21.3% | 3.3% | -2.3%  | -2.1%  |
| Kenya      | 2008-2009 | 8.9%  | 24.0% | 3.4% | 0.5%   | 0.4%   |
| Kenya      | 2014-2014 | 5.8%  | 21.6% | 1.6% | 2.7%   | 3.2%   |
| Lesotho    | 2004-2004 | 6.1%  | 16.0% | 3.4% | 3.8%   | 5.1%   |
| Lesotho    | 2009-2010 | 4.9%  | 16.3% | 2.2% | 3.8%   | 6.2%   |
| Lesotho    | 2014-2014 | 3.9%  | 12.5% | 1.4% | -0.2%  | 1.2%   |
| Liberia    | 2007-2007 | 8.4%  | 21.7% | 3.8% | 14.4%  | 9.2%   |
| Liberia    | 2013-2013 | 6.8%  | 21.6% | 2.6% | -0.1%  | 8.1%   |
| Madagascar | 1992-1992 | 6.3%  | 25.2% | 1.3% | -11.2% | -9.0%  |
| Madagascar | 1997-1997 | 10.1% | 31.0% | 3.2% | 0.1%   | -1.0%  |
| Madagascar | 2003-2004 | 15.5% | 37.1% | 6.3% | -0.7%  | -0.7%  |
| Malawi     | 1992-1992 | 5.9%  | 17.1% | 2.1% | 7.4%   | 5.6%   |
| Malawi     | 2000-2000 | 6.9%  | 17.8% | 3.0% | -0.9%  | -1.6%  |
| Malawi     | 2004-2004 | 7.0%  | 16.3% | 3.6% | 2.3%   | 3.1%   |
| Malawi     | 2010-2010 | 4.5%  | 13.8% | 1.8% | 6.1%   | 5.3%   |
| Malawi     | 2015-2016 | 3.4%  | 14.3% | 0.9% | 2.4%   | 2.4%   |
| Maldives   | 2009-2009 | 12.1% | 37.2% | 3.5% | 6.9%   | 6.8%   |
| Maldives   | 2016-2017 | 10.1% | 36.2% | 2.6% | 1.1%   | 1.2%   |
| Mali       | 2006-2006 | 17.4% | 37.3% | 7.8% | 6.9%   | 6.9%   |

|              |           |       |       |       |       |       |
|--------------|-----------|-------|-------|-------|-------|-------|
| Mali         | 2012-2013 | 13.8% | 32.7% | 6.2%  | 5.9%  | 5.8%  |
| Mali         | 2018-2018 | 9.9%  | 32.8% | 3.2%  | 4.2%  | 3.7%  |
| Morocco      | 1992-1992 | 2.8%  | 8.7%  | 1.3%  | 4.6%  | 5.0%  |
| Morocco      | 2003-2004 | 11.9% | 22.1% | 6.1%  | 3.2%  | 3.0%  |
| Mozambique   | 2003-2003 | 5.4%  | 15.8% | 2.4%  | 1.1%  | 5.6%  |
| Mozambique   | 2011-2011 | 5.7%  | 16.4% | 2.1%  | 10.9% | 3.8%  |
| Namibia      | 1992-1992 | 9.5%  | 28.0% | 3.2%  | 6.0%  | 5.0%  |
| Namibia      | 2000-2000 | 10.7% | 31.8% | 3.6%  | -1.8% | 1.5%  |
| Namibia      | 2006-2007 | 8.4%  | 27.0% | 2.7%  | 4.1%  | 4.2%  |
| Namibia      | 2013-2013 | 8.9%  | 27.4% | 3.4%  | 1.8%  | 3.2%  |
| Nepal        | 2001-2001 | 10.8% | 38.6% | 2.7%  | 4.5%  | 4.2%  |
| Nepal        | 2006-2006 | 12.7% | 42.1% | 3.0%  | 2.8%  | 2.2%  |
| Nepal        | 2011-2011 | 10.9% | 37.5% | 2.9%  | 3.9%  | 4.3%  |
| Nepal        | 2016-2016 | 9.8%  | 36.8% | 2.0%  | 2.6%  | 2.7%  |
| Nicaragua    | 1998-1998 | 3.3%  | 10.8% | 1.6%  | 4.8%  | 2.6%  |
| Nicaragua    | 2001-2001 | 2.5%  | 9.3%  | 1.1%  | 2.6%  | 2.5%  |
| Niger        | 2006-2006 | 13.3% | 35.0% | 5.1%  | 3.7%  | 3.5%  |
| Niger        | 2012-2012 | 19.5% | 44.3% | 8.4%  | -1.6% | -1.6% |
| Nigeria      | 1990-1990 | 10.9% | 27.9% | 4.2%  | 0.2%  | -0.7% |
| Nigeria      | 2003-2003 | 12.4% | 29.1% | 5.8%  | 14.5% | 12.5% |
| Nigeria      | 2008-2008 | 16.9% | 30.2% | 10.1% | -1.9% | 3.8%  |
| Nigeria      | 2013-2013 | 17.9% | 36.3% | 9.2%  | 1.6%  | 1.5%  |
| Pakistan     | 1990-1991 | 11.1% | 28.2% | 4.1%  | 1.9%  | 1.5%  |
| Pakistan     | 2012-2013 | 11.0% | 29.1% | 4.5%  | 1.4%  | 0.8%  |
| Pakistan     | 2017-2018 | 9.5%  | 25.8% | 4.2%  | 3.0%  | 3.5%  |
| Peru         | 1991-1992 | 2.3%  | 7.9%  | 0.9%  | -5.3% | -3.8% |
| Peru         | 1996-1996 | 2.3%  | 6.9%  | 1.1%  | 5.1%  | 5.4%  |
| Peru         | 2000-2000 | 1.8%  | 6.4%  | 0.7%  | -0.2% | -0.1% |
| Peru         | 2003-2008 | 1.1%  | 4.8%  | 0.3%  | 6.2%  | 6.6%  |
| Peru         | 2009-2009 | 0.8%  | 5.0%  | 0.3%  | 9.2%  | 8.3%  |
| Peru         | 2010-2010 | 0.8%  | 5.7%  | 0.2%  | 1.0%  | 0.3%  |
| Peru         | 2011-2011 | 0.6%  | 5.2%  | 0.1%  | 6.2%  | 7.5%  |
| Peru         | 2012-2012 | 0.7%  | 5.7%  | 0.2%  | 5.4%  | 5.5%  |
| Rwanda       | 1992-1992 | 5.1%  | 17.7% | 2.0%  | -1.0% | -0.9% |
| Rwanda       | 2000-2000 | 9.1%  | 21.6% | 4.1%  | -0.9% | -1.2% |
| Rwanda       | 2005-2005 | 5.0%  | 14.6% | 1.7%  | 6.1%  | 5.9%  |
| Rwanda       | 2010-2010 | 3.0%  | 10.9% | 1.0%  | 4.0%  | 4.0%  |
| Rwanda       | 2014-2015 | 2.4%  | 9.2%  | 0.9%  | 3.5%  | 4.0%  |
| Senegal      | 1992-1993 | 9.8%  | 28.4% | 3.4%  | -1.2% | -1.6% |
| Senegal      | 2005-2005 | 9.4%  | 30.9% | 2.6%  | 3.5%  | 3.3%  |
| Senegal      | 2010-2011 | 10.2% | 34.0% | 3.0%  | 0.8%  | 0.7%  |
| Senegal      | 2012-2013 | 10.4% | 36.5% | 2.8%  | -1.3% | 0.4%  |
| Senegal      | 2014-2014 | 7.0%  | 30.5% | 1.1%  | 5.0%  | 1.0%  |
| Senegal      | 2017-2017 | 9.7%  | 36.8% | 1.7%  | 3.5%  | 3.4%  |
| Sierra Leone | 2008-2008 | 11.7% | 25.9% | 5.9%  | 2.0%  | 5.2%  |
| Sierra Leone | 2013-2013 | 10.5% | 21.9% | 5.4%  | 17.9% | 12.6% |
| Tajikistan   | 2012-2012 | 10.6% | 25.2% | 4.8%  | -4.2% | 0.1%  |
| Tajikistan   | 2017-2017 | 6.7%  | 19.3% | 2.4%  | -3.3% | 4.4%  |
| Tanzania     | 1991-1992 | 8.7%  | 23.1% | 3.4%  | 3.7%  | 3.2%  |
| Tanzania     | 1996-1996 | 9.2%  | 25.4% | 3.6%  | 1.2%  | 0.6%  |
| Tanzania     | 1999-1999 | 5.9%  | 21.7% | 2.4%  | 2.2%  | 2.0%  |
| Tanzania     | 2004-2005 | 4.5%  | 18.2% | 1.5%  | 3.8%  | 4.2%  |
| Tanzania     | 2010-2010 | 6.8%  | 20.8% | 2.3%  | 2.6%  | 2.4%  |
| Tanzania     | 2015-2016 | 5.1%  | 19.5% | 1.5%  | 3.7%  | 3.4%  |
| Turkey       | 1993-1993 | 3.6%  | 11.5% | 1.0%  | 4.5%  | 4.3%  |
| Turkey       | 1998-1998 | 3.7%  | 12.2% | 1.4%  | 6.4%  | 5.8%  |

|          |           |       |       |      |       |       |
|----------|-----------|-------|-------|------|-------|-------|
| Turkey   | 2003-2003 | 1.1%  | 4.9%  | 0.3% | 4.1%  | 4.3%  |
| Uganda   | 2000-2001 | 5.1%  | 17.0% | 1.7% | 1.7%  | 2.5%  |
| Uganda   | 2006-2006 | 7.1%  | 20.1% | 2.5% | 6.3%  | 6.6%  |
| Uganda   | 2011-2011 | 5.9%  | 20.4% | 2.0% | 4.5%  | 4.8%  |
| Uganda   | 2016-2016 | 4.1%  | 15.8% | 1.6% | 2.7%  | 2.1%  |
| Yemen    | 1991-1992 | 15.4% | 35.5% | 6.6% | 12.8% | 13.1% |
| Yemen    | 2013-2013 | 17.0% | 43.8% | 6.3% | 3.1%  | -0.6% |
| Zambia   | 1992-1992 | 6.7%  | 19.1% | 2.6% | -7.4% | -4.5% |
| Zambia   | 1996-1996 | 5.7%  | 17.3% | 2.0% | 0.5%  | 0.4%  |
| Zambia   | 2001-2002 | 6.5%  | 19.9% | 2.5% | 2.7%  | 2.3%  |
| Zambia   | 2007-2007 | 6.6%  | 17.8% | 3.1% | 3.3%  | 5.1%  |
| Zambia   | 2013-2014 | 6.9%  | 19.2% | 3.0% | 10.3% | 3.3%  |
| Zimbabwe | 1999-1999 | 9.3%  | 21.5% | 5.2% | -2.0% | -0.3% |
| Zimbabwe | 2005-2006 | 7.6%  | 19.4% | 3.3% | -4.5% | -4.1% |
| Zimbabwe | 2010-2011 | 3.8%  | 15.1% | 1.3% | 36.9% | 38.9% |
| Zimbabwe | 2015-2015 | 3.8%  | 13.6% | 1.5% | 1.0%  | 0.6%  |

Wasting estimates are from the authors' estimates from DHS data, while lagged GNI and GDP growth are sourced from the UN. GDP=Gross Domestic Product and GNI=Gross National Income. WHZ=Weight for height Z score.

Supplementary Table 3: Pooled sample sizes by country

| Country        | First year | Last Year | Total Observations | Share of total < 5 years observations in this DHS dataset | Share of total < 5 years population in DHS countries |
|----------------|------------|-----------|--------------------|-----------------------------------------------------------|------------------------------------------------------|
| Albania        | 2008       | 2018      | 3780               | 0.30%                                                     | 0.05%                                                |
| Armenia        | 2000       | 2016      | 5578               | 0.44%                                                     | 0.06%                                                |
| Bangladesh     | 1996       | 2014      | 33293              | 2.65%                                                     | 5.03%                                                |
| Benin          | 2001       | 2018      | 38118              | 3.03%                                                     | 0.43%                                                |
| Bolivia        | 1998       | 2008      | 22499              | 1.79%                                                     | 0.36%                                                |
| Burkina Faso   | 1993       | 2010      | 23946              | 1.91%                                                     | 0.74%                                                |
| Burundi        | 2010       | 2017      | 8929               | 0.71%                                                     | 0.49%                                                |
| Cambodia       | 2000       | 2014      | 15104              | 1.20%                                                     | 0.51%                                                |
| Cameroon       | 2004       | 2011      | 8141               | 0.65%                                                     | 1.00%                                                |
| Chad           | 2004       | 2015      | 14268              | 1.14%                                                     | 0.75%                                                |
| Colombia       | 1995       | 2010      | 30359              | 2.42%                                                     | 1.26%                                                |
| Congo Rep.     | 2005       | 2012      | 7943               | 0.63%                                                     | 0.21%                                                |
| Congo DRC      | 2007       | 2014      | 11223              | 0.89%                                                     | 3.98%                                                |
| Cote d'Ivoire  | 1998       | 2012      | 4691               | 0.37%                                                     | 0.90%                                                |
| Dominican Rep. | 1996       | 2013      | 24875              | 1.98%                                                     | 0.32%                                                |
| Egypt          | 1992       | 2014      | 70457              | 5.61%                                                     | 2.98%                                                |
| Ethiopia       | 2000       | 2016      | 30686              | 2.44%                                                     | 4.24%                                                |
| Gabon          | 2000       | 2012      | 6668               | 0.53%                                                     | 0.06%                                                |
| Ghana          | 1998       | 2014      | 10785              | 0.86%                                                     | 1.03%                                                |
| Guatemala      | 1995       | 2015      | 24092              | 1.92%                                                     | 0.59%                                                |
| Guinea         | 1999       | 2018      | 13282              | 1.06%                                                     | 0.51%                                                |
| Haiti          | 2000       | 2017      | 17239              | 1.37%                                                     | 0.38%                                                |
| Honduras       | 2005       | 2012      | 18283              | 1.46%                                                     | 0.31%                                                |
| India          | 2005       | 2016      | 268786             | 21.40%                                                    | 38.14%                                               |
| Jordan         | 1990       | 2012      | 23443              | 1.87%                                                     | 0.24%                                                |
| Kazakhstan     | 1995       | 1999      | 1213               | 0.10%                                                     | 0.39%                                                |
| Kenya          | 1993       | 2014      | 35322              | 2.81%                                                     | 1.96%                                                |
| Lesotho        | 2004       | 2014      | 4206               | 0.33%                                                     | 0.08%                                                |
| Liberia        | 2007       | 2013      | 6762               | 0.54%                                                     | 0.19%                                                |
| Madagascar     | 1992       | 2004      | 11554              | 0.92%                                                     | 0.87%                                                |
| Malawi         | 1992       | 2016      | 29972              | 2.39%                                                     | 0.73%                                                |
| Maldives       | 2009       | 2017      | 4006               | 0.32%                                                     | 0.01%                                                |
| Mali           | 2006       | 2018      | 23552              | 1.88%                                                     | 0.78%                                                |
| Morocco        | 1992       | 2004      | 10053              | 0.80%                                                     | 1.00%                                                |
| Mozambique     | 2003       | 2011      | 16879              | 1.34%                                                     | 1.20%                                                |
| Namibia        | 1992       | 2013      | 9835               | 0.78%                                                     | 0.08%                                                |
| Nepal          | 2001       | 2016      | 15800              | 1.26%                                                     | 1.04%                                                |
| Nicaragua      | 1998       | 2001      | 12613              | 1.00%                                                     | 0.21%                                                |
| Niger          | 2006       | 2012      | 8603               | 0.68%                                                     | 0.90%                                                |

|              |      |      |         |         |         |
|--------------|------|------|---------|---------|---------|
| Nigeria      | 1990 | 2013 | 54032   | 4.30%   | 8.44%   |
| Pakistan     | 1990 | 2018 | 10997   | 0.88%   | 6.48%   |
| Peru         | 1991 | 2012 | 70667   | 5.63%   | 0.92%   |
| Rwanda       | 1992 | 2015 | 21280   | 1.69%   | 0.46%   |
| Senegal      | 1992 | 2017 | 33166   | 2.64%   | 0.67%   |
| Sierra Leone | 2008 | 2013 | 5595    | 0.45%   | 0.35%   |
| Tajikistan   | 2012 | 2017 | 10392   | 0.83%   | 0.31%   |
| Tanzania     | 1991 | 2016 | 36573   | 2.91%   | 2.18%   |
| Turkey       | 1993 | 2003 | 9846    | 0.78%   | 2.02%   |
| Uganda       | 2000 | 2016 | 13529   | 1.08%   | 1.72%   |
| Yemen        | 1991 | 2013 | 15971   | 1.27%   | 1.11%   |
| Zambia       | 1992 | 2014 | 31990   | 2.55%   | 0.67%   |
| Zimbabwe     | 1999 | 2015 | 15200   | 1.21%   | 0.66%   |
| Total        | 1990 | 2018 | 1256076 | 100.00% | 100.00% |

Wasting estimates are from the authors' estimates from DHS data, while lagged GNI and GDP growth are sourced from the UN.



Supplementary Fig. 1: Local polynomial estimates of moderate/severe wasting (WHZ < -2) prevalence against child age for various regions in Asia and sub-Saharan Africa

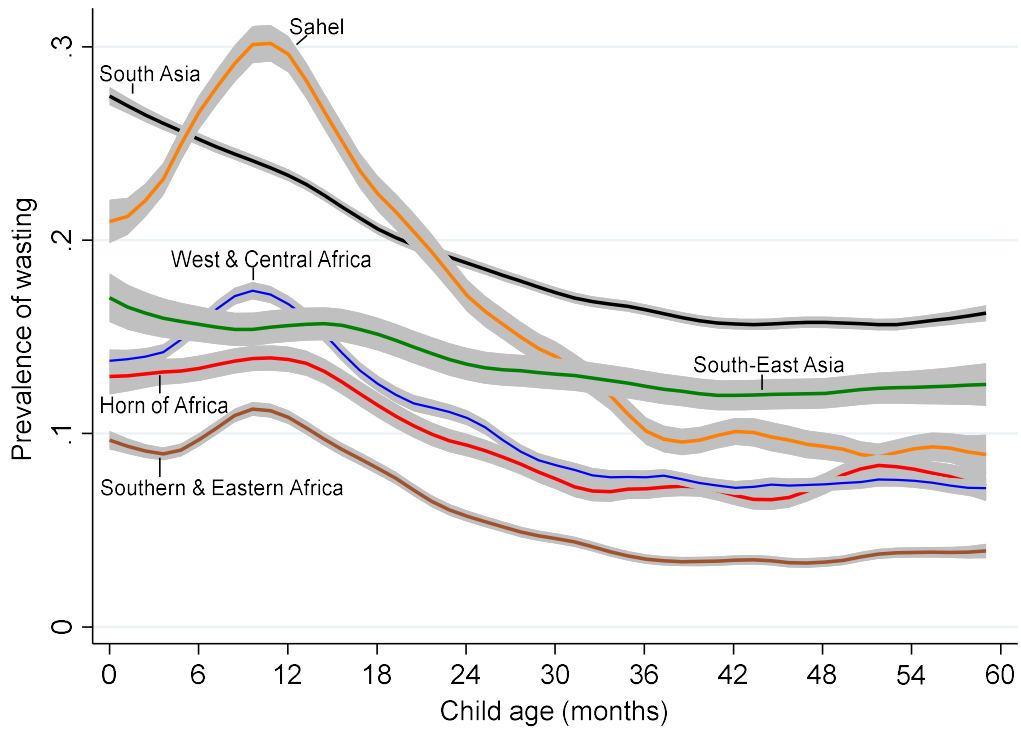

Data are presented as predicted values +/- 95% confidence interval estimates derived from local polynomial regressions of wasting (WHZ < -2) status against child age using the *lpolyci* command in STATA™. Sample sizes are as follows. South Asia:  $N = 402,990$ . South-East Asia:  $N = 27,614$ . Sahel = 80,717. West and Central Africa:  $N = 248,204$ . Horn of Africa:  $N = 68,608$ ; Southern and Eastern Africa:  $N = 228,818$ . WHZ=Weight for height Z score.

Supplementary Fig 2: Histograms of lagged annual changes in GNI and GDP per capita across 171 surveys covering 1990-2018

Panel A: Lagged annual changes in GNI growth

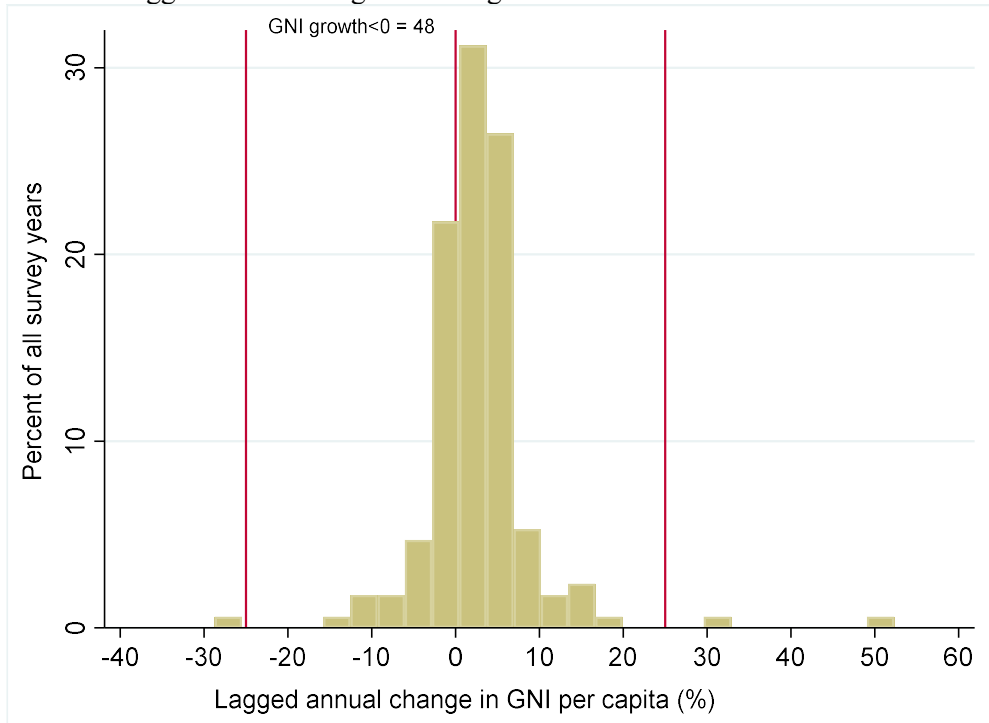

Panel B: Lagged annual changes in GDP growth

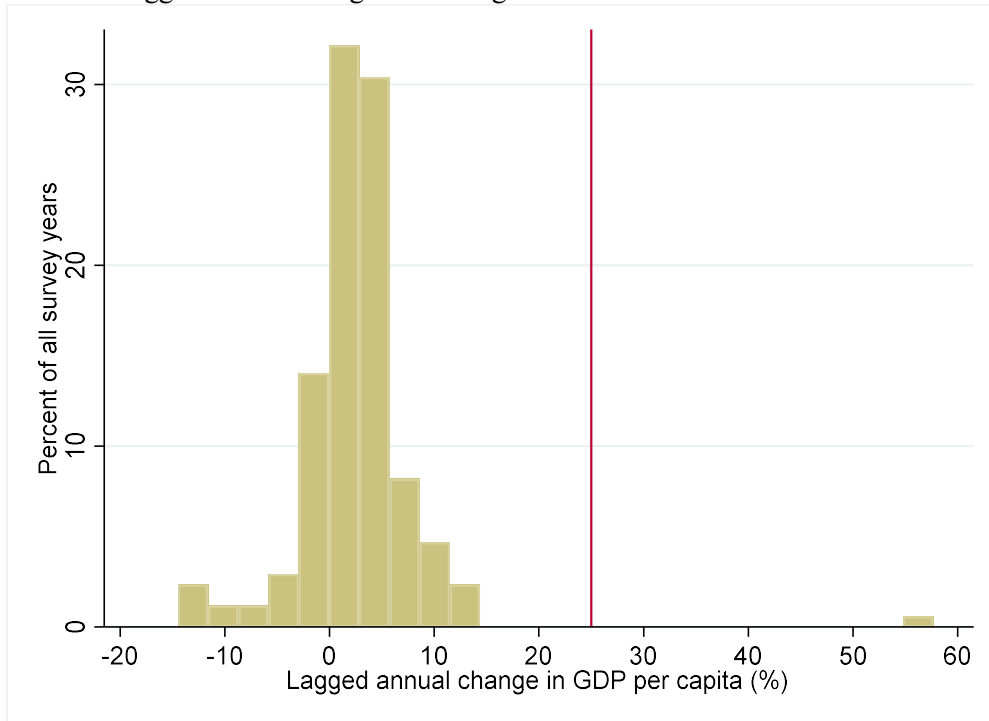

$N = 171$  countries. Authors' estimates of the distribution of UN data on changes in GNI and GDP per capita for the DHS survey years. Red lines show thresholds for extreme values used to omit potential outliers. GDP=Gross Domestic Product and GNI=Gross National Income.

Supplementary Fig 3: Variation of the elasticity of wasting with respect to GNI growth for different specifications and sample restrictions

Panel A: Any wasting (WHZ < -1)

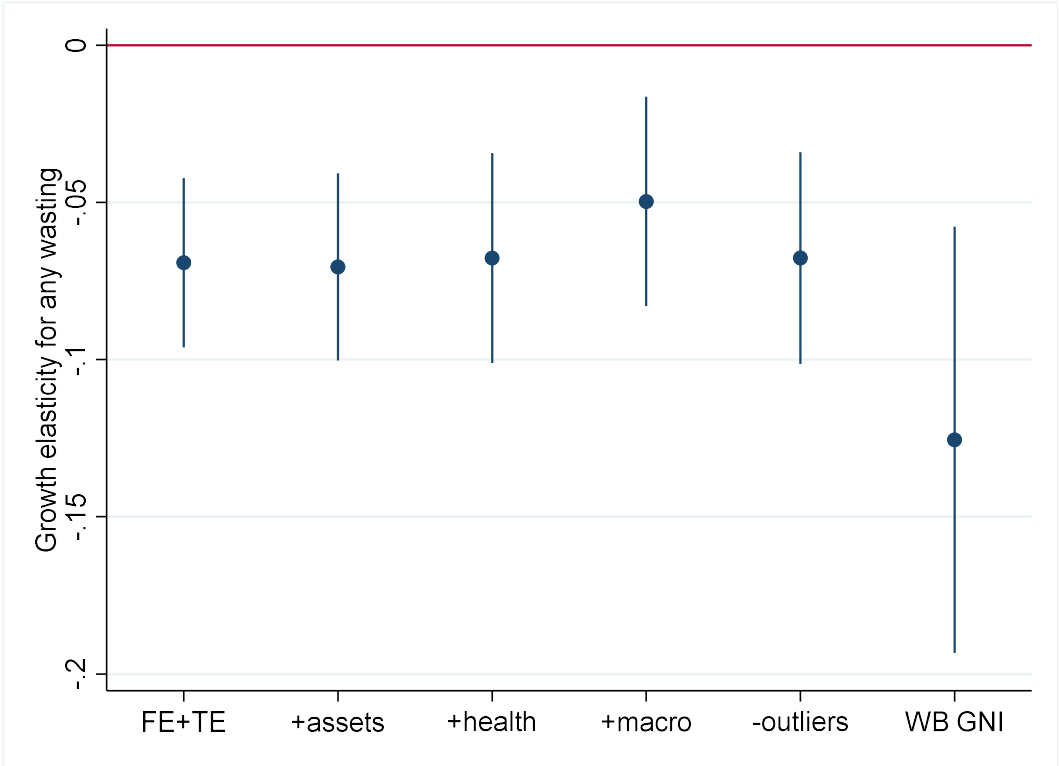

Panel B: Moderate/severe wasting (WHZ < -2)

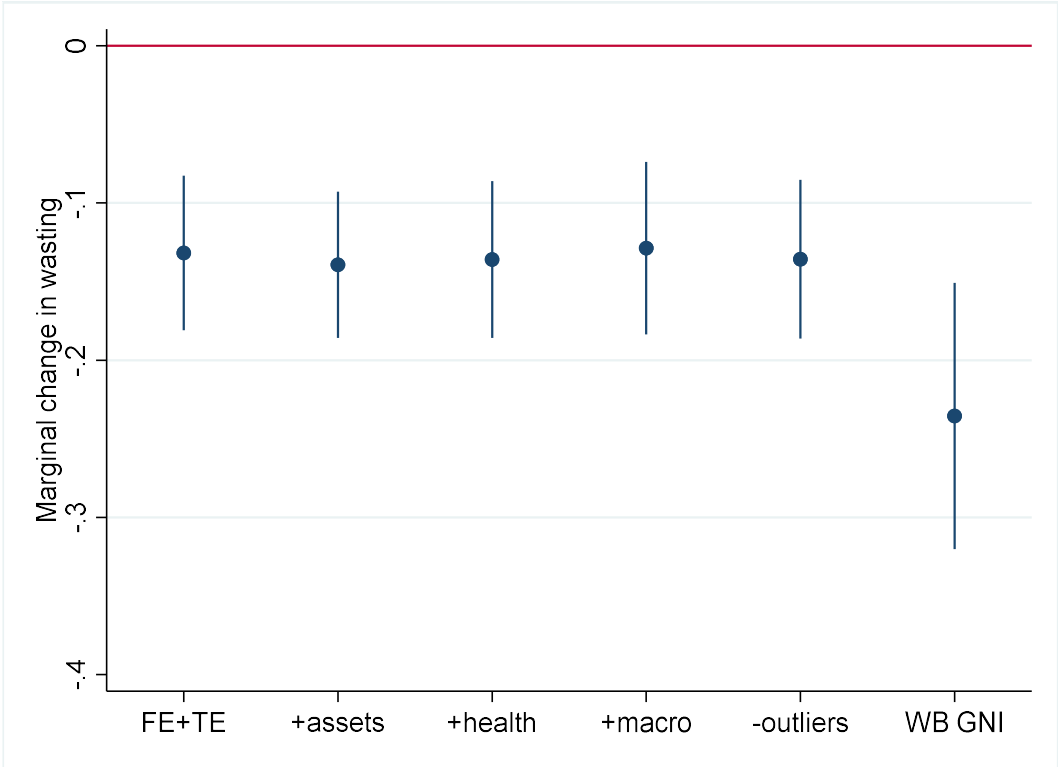

Panel C: Severe wasting (WHZ < -3)

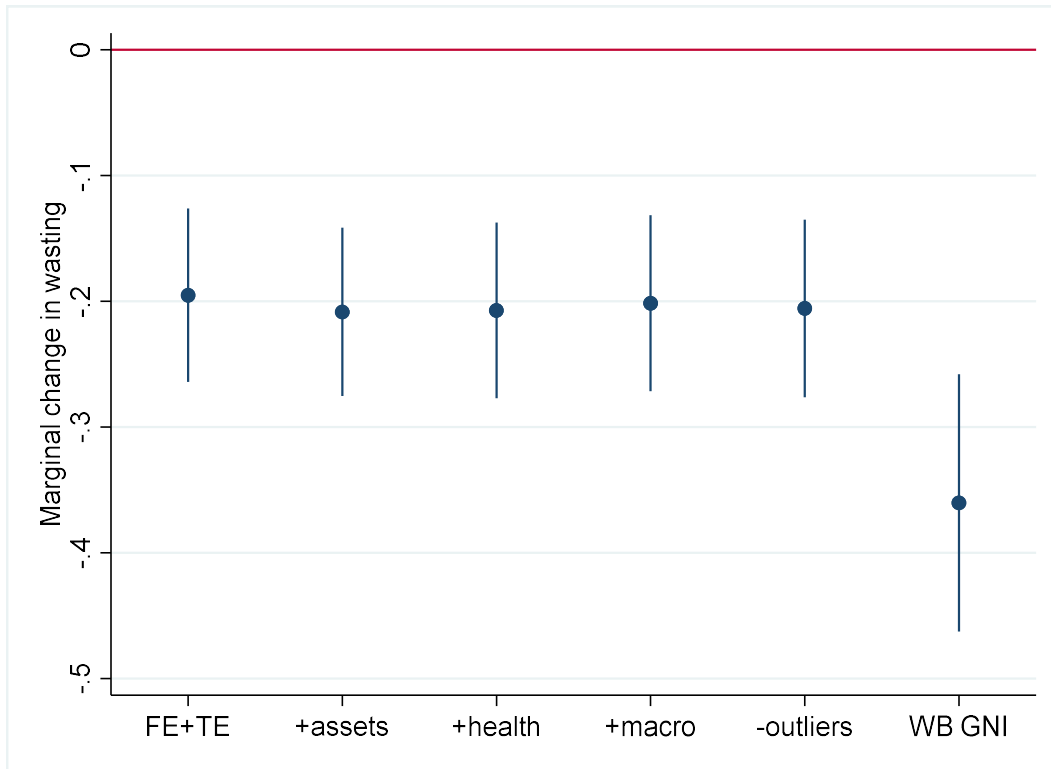

Data are presented are linear probability coefficient point estimates for lagged GNI growth with 95% confidence interval derived from the regression model outlined in equation (1). The different model specifications (and samples sizes) are specified sequentially as follows: FE+TE = fixed effects and time effects only ( $N = 1,256,076$ ); “+ assets” adds household assets, education, toilet and water ownership to the FE+TE model ( $N = 1,256,076$ ); “+health” adds antenatal care, medical facility birth and all vaccinations to the “+assets model” ( $N = 1,256,076$ ); “+macro” adds controls for lagged national rainfall, temperature and battle deaths ( $N = 1,256,076$ ); “-large values” remove GNI growth values greater than 25% in absolute magnitude ( $N = 1,259,097$ ); “WB GNI” replaces the UN GNI measure with the World Bank GNI measure ( $N = 1,136,206$ ). GDP=Gross Domestic Product and GNI=Gross National Income. WHZ=Weight for height Z score. WB=World Bank.

Supplementary Fig. 4: Variation of the elasticity of wasting with respect to GDP growth for different specifications and sample restrictions

Panel A: Any wasting (WHZ < -1)

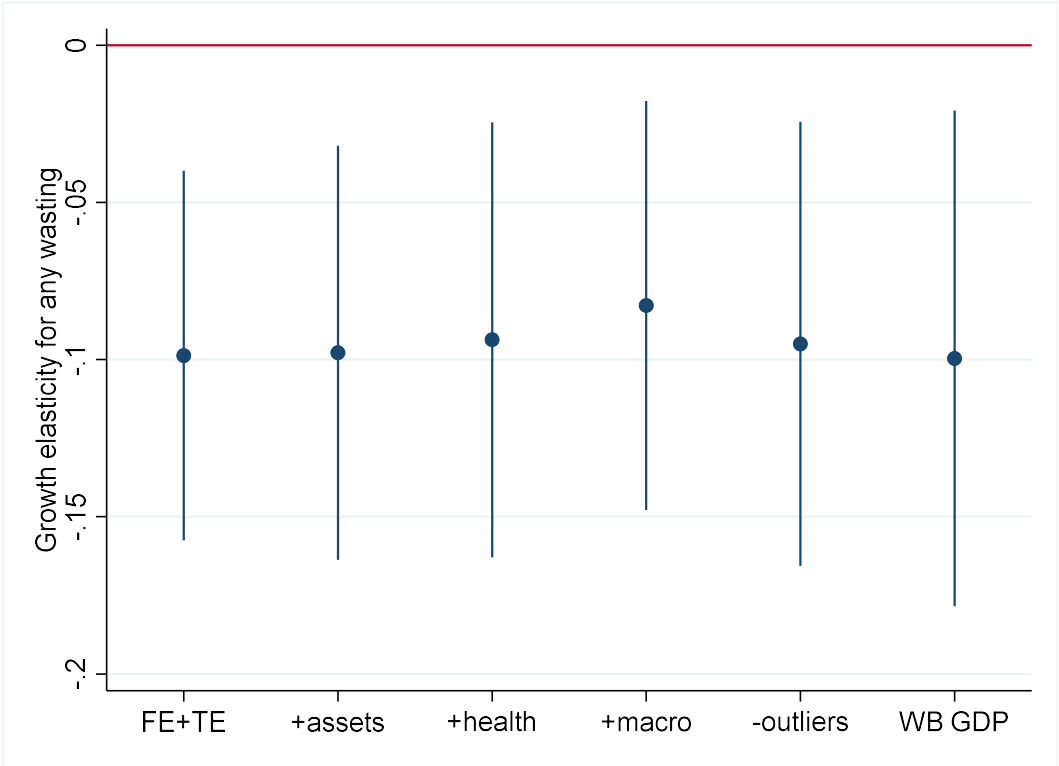

Panel B: Moderate/severe wasting (WHZ < -2)

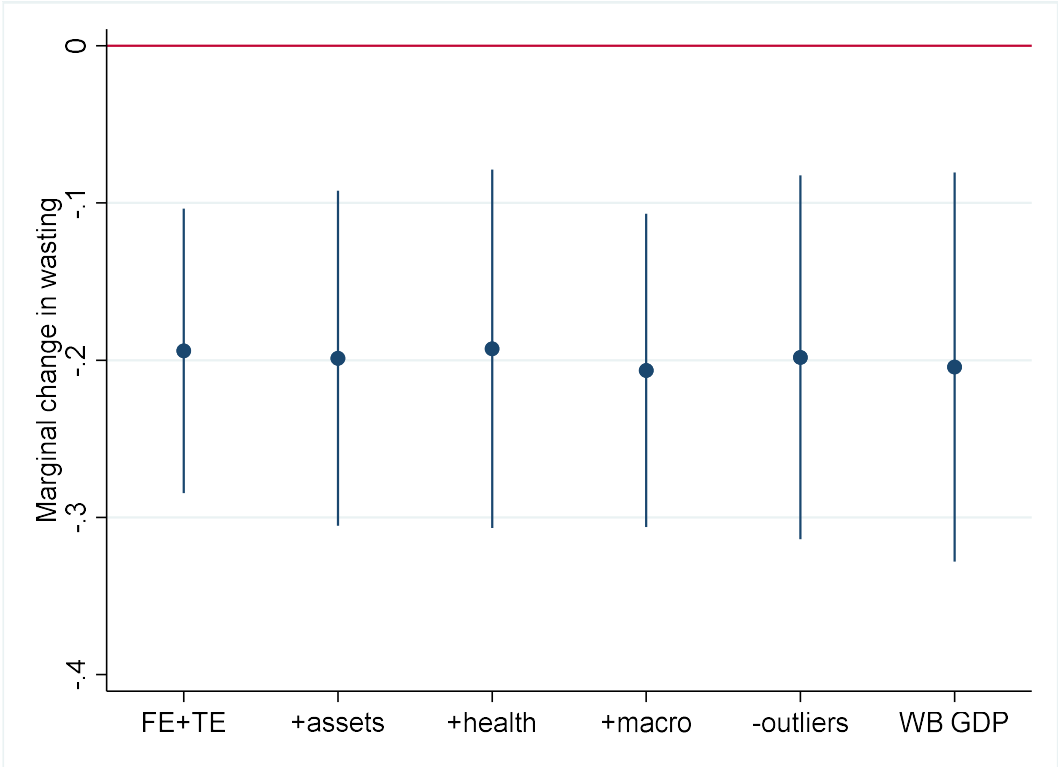

Panel C: Severe wasting (WHZ < -3)

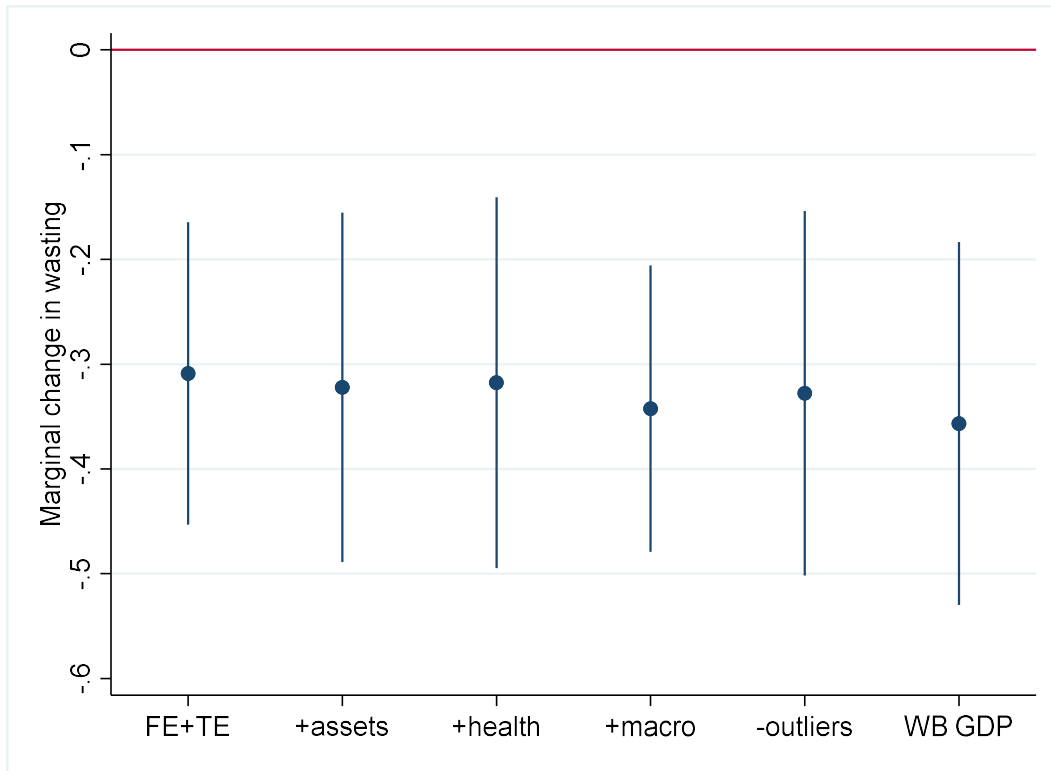

Data are presented as linear probability coefficient point estimates for lagged GDP growth with 95% confidence interval derived from least squares regressions as outlined in equation (1). The different model specifications (and samples sizes) are specified sequentially as follows: FE+TE = fixed effects and time effects only ( $N = 1,256,076$ ); “+ assets” adds household assets, education, toilet and water ownership to the FE+TE model ( $N = 1,256,076$ ); “+health” adds antenatal care, medical facility birth and all vaccinations to the “+assets model” ( $N = 1,256,076$ ); “+macro” adds controls for lagged national rainfall, temperature and battle deaths ( $N = 1,256,076$ ); “-large values” remove GNI growth values greater than 25% in absolute magnitude ( $N = 1,259,097$ ); “WB GDP” replaces the UN GDP measure with the World Bank GDP measure ( $N = 1,136,206$ ). GDP=Gross Domestic Product and GNI=Gross National Income. WHZ=Weight for height Z score. WB = World Bank.



Supplementary Table 4: Multivariate linear probability models of wasting risks as a function of lagged GNI growth shocks, with interactions for urban location and female status (children 0-59 months)

|                                                    | Any wasting<br>(WHZ < -1)     | Moderate/severe<br>wasting (WHZ < -2) | Severe wasting<br>(WHZ < -3)  |
|----------------------------------------------------|-------------------------------|---------------------------------------|-------------------------------|
|                                                    | (1)                           | (2)                                   | (3)                           |
|                                                    | N=1,256,076                   | N=1,256,076                           | N=1,256,076                   |
| GNI growth elasticity ( $w.g^n$ ) <sup>a</sup>     | -0.060***<br>(-0.083, -0.037) | -0.148***<br>(-0.189, -0.106)         | -0.223***<br>(-0.300, -0.147) |
| GNI growth elasticity ( $w.g^n$ )*urban dummy      | -0.047**<br>(-0.087, -0.006)  | -0.076<br>(-0.187, 0.035)             | 0.004<br>(-0.103, 0.111)      |
| R-squared                                          | 0.432                         | 0.200                                 | 0.085                         |
|                                                    | (4)                           | (5)                                   | (6)                           |
|                                                    | N=1,256,076                   | N=1,256,076                           | N=1,256,076                   |
| GNI growth elasticity ( $w.g^n$ ) <sup>b</sup>     | -0.079***<br>(-0.104, -0.054) | -0.132***<br>(-0.180, -0.084)         | -0.197***<br>(-0.277, -0.118) |
| GNI growth elasticity ( $w.g^n$ )*girl dummy       | 0.016<br>(-0.012, 0.044)      | -0.026<br>(-0.077, 0.026)             | -0.050<br>(-0.135, 0.035)     |
| R-squared                                          | 0.432                         | 0.200                                 | 0.085                         |
| DHS child, mother, household effects? <sup>c</sup> | Yes                           | Yes                                   | Yes                           |
| Country fixed effects?                             | Yes                           | Yes                                   | Yes                           |
| Region-specific temporal effects? <sup>d</sup>     | Yes                           | Yes                                   | Yes                           |

Notes:  $N = 1,256,076$  children in all regressions. Results are linear probability coefficient point estimates with 95% confidence intervals based on standard errors clustered at the country level reported in parentheses, with significance levels as follows: \*\*\*  $p < 0.01$ , \*\*  $p < 0.05$ , \*  $p < 0.10$ . Regressions are weighted to be representative of the < 5 year population of children of all countries included in this DHS dataset through a three-step weighting procedure factoring in country < 5 year population size, DHS round sample size and conventional DHS survey weights. The coefficients in these regressions can also be interpreted as elasticities as follows: a. This elasticity is the coefficient on the interaction between annual change in GNI per capita lagged one year and the country-specific prevalence of wasting averaged over all DHS rounds, defined for each specific wasting indicator. The coefficient therefore represents the elasticity of wasting b. This is analogous coefficient/elasticity for lagged growth in GDP per capita. The regressions control for various factors not reported for the sake of brevity: c. DHS child, maternal and household effects include household asset ownership, maternal education years, piped water and flush toilet access, whether the child was born in a medical facility, whether the mother received four or more antenatal care visits, whether the child received all vaccinations, whether the child was born of a teenage pregnancy, whether the mother has four or more children, whether the child is female, and resides in a rural area. d. Temporal effects include region-specific seasonality effects using month of survey dummies, wasting-age dynamics captured by child age dummies, and time trend effects captured by 5-year time dummies. GDP=Gross Domestic Product and GNI=Gross National Income. WHZ=Weight for height Z score.

Supplementary Table 5: Multivariate linear probability models of wasting risks as a function of lagged GDP growth shocks, with interactions for urban location and female status (children 0-59 months)

|                                                    | Any wasting<br>(WHZ < -1)      | Moderate/severe<br>wasting (WHZ < -2) | Severe wasting<br>(WHZ < -3)  |
|----------------------------------------------------|--------------------------------|---------------------------------------|-------------------------------|
|                                                    | (1)                            | (2)                                   | (3)                           |
|                                                    | N=1,256,076                    | N=1,256,076                           | N=1,256,076                   |
| GDP growth elasticity ( $w.g^t$ )                  | -0.0679***<br>(-0.152, -0.005) | -0.167**<br>(-0.296, -0.038)          | -0.291***<br>(-0.514, -0.067) |
| GDP growth elasticity ( $w.g^t$ )*urban dummy      | -0.047*<br>(-0.096, 0.004)     | -0.053**<br>(-0.099, -0.006)          | 0.004<br>(-0.126, 0.121)      |
| R-squared                                          | 0.432                          | 0.200                                 | 0.085                         |
|                                                    | (4)                            | (5)                                   | (6)                           |
|                                                    | N=1,256,076                    | N=1,256,076                           | N=1,256,076                   |
| GDP growth elasticity ( $w.g^t$ )                  | -0.096***<br>(-0.171, -0.021)  | -0.163***<br>(-0.299, -0.028)         | -0.26***<br>(-0.513, -0.011)  |
| GDP growth elasticity ( $w.g^t$ )*girl dummy       | 0.016<br>(-0.004, 0.037)       | -0.026*<br>(-0.077, 0.026)            | -0.050**<br>(-0.121, 0.003)   |
| R-squared                                          | 0.432                          | 0.200                                 | 0.085                         |
| DHS child, mother, household effects? <sup>c</sup> | Yes                            | Yes                                   | Yes                           |
| Country fixed effects?                             | Yes                            | Yes                                   | Yes                           |
| Region-specific temporal effects? <sup>d</sup>     | Yes                            | Yes                                   | Yes                           |

Notes:  $N = 1,256,076$  children in all regressions. Results are linear probability model coefficient point estimates with 95% confidence intervals based on standard errors clustered at the country level reported in parentheses, with significance levels as follows: \*\*\*  $p < 0.01$ , \*\*  $p < 0.05$ , \*  $p < 0.10$ . Regressions are weighted to be representative of the < 5 year population of children of all countries included in this DHS dataset through a three-step weighting procedure factoring in country < 5 year population size, DHS round sample size and conventional DHS survey weights. The coefficients in these regressions can also be interpreted as elasticities as follows: a. This elasticity is the coefficient on the interaction between annual change in GDP per capita lagged one year and the country-specific prevalence of wasting averaged over all DHS rounds, defined for each specific wasting indicator. The coefficient therefore represents the elasticity of wasting b. This is analogous coefficient/elasticity for lagged growth in GDP per capita. The regressions control for various factors not reported for the sake of brevity: c. DHS child, maternal and household effects include household asset ownership, maternal education years, piped water and flush toilet access, whether the child was born in a medical facility, whether the mother received four or more antenatal care visits, whether the child received all vaccinations, whether the child was born of a teenage pregnancy, whether the mother has four or more children, whether the child is female, and resides in a rural area. d. Temporal effects include region-specific seasonality effects using month of survey dummies, wasting-age dynamics captured by child age dummies, and time trend effects captured by 5-year time dummies. GDP=Gross Domestic Product and GNI=Gross National Income. WHZ=Weight for height Z score.

Supplementary Fig. 5: Elasticities of children’s consumption of various foods with respect to GNI growth or GDP growth (90% CIs)

Panel A: GNI growth

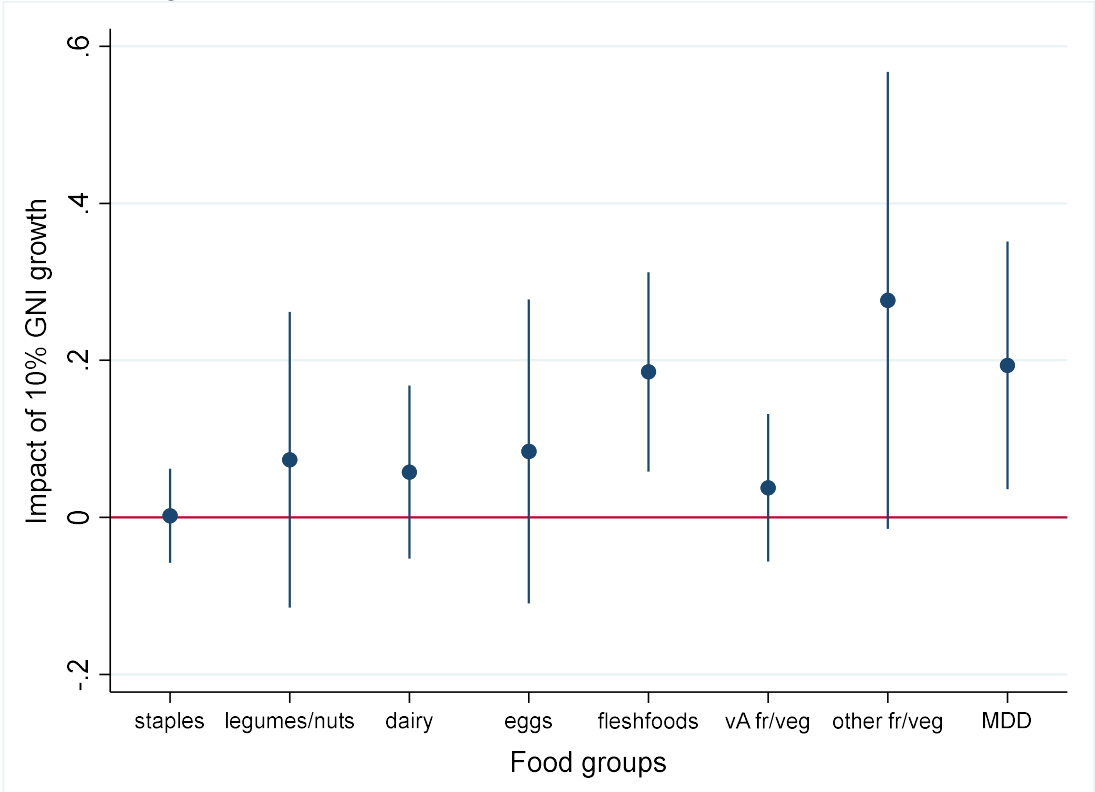

Panel B: GDP growth

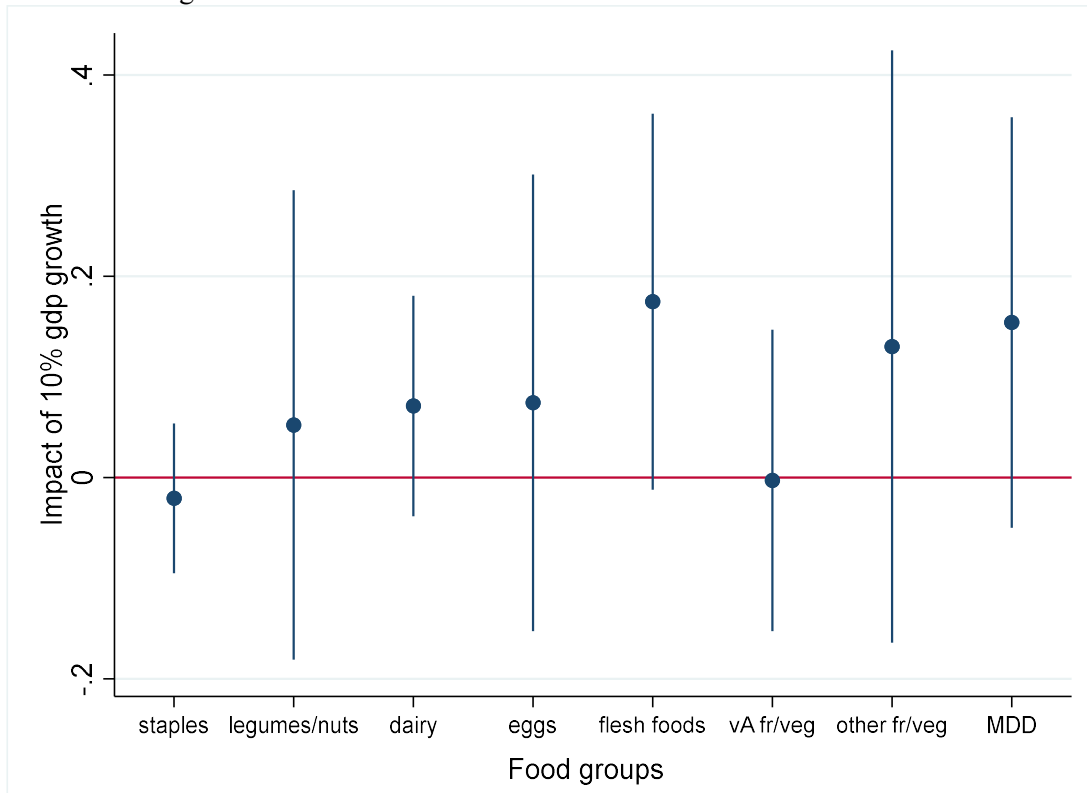

$N = 390,361$  children in all regressions. Results are linear probability model coefficient point estimates of the impact of GNI or GDP shocks on whether a child consumed each food group in the past 24 hours, with 95% confidence intervals based on standard errors clustered at the country level reported in parentheses, with significance levels as follows: \*\*\*  $p < 0.01$ , \*\*  $p < 0.05$ , \*  $p < 0.10$ . “staples” includes grains, roots, tubers. “flesh foods” refers to meat, organs and fish. “vA fr/veg” refers to vitamin A-rich fruits and vegetables, while “other fr/veg” refers to all other fruits and vegetables. MDD refers to minimum dietary diversity. Regressions are weighted to be representative of the < 5 year population of children of all countries included in this DHS dataset through a three-step weighting procedure factoring in country < 5 year population size, DHS round sample size and conventional DHS survey weights. The regressions control for various factors not reported for the sake of brevity: DHS child, maternal and household effects include household asset ownership, maternal education years, piped water and flush toilet access, whether the child was born in a medical facility, whether the mother received four or more antenatal care visits, whether the child received all vaccinations, whether the child was born of a teenage pregnancy, whether the mother has four or more children, whether the child is female, and resides in a rural area. Temporal effects include region-specific seasonality effects using month of survey dummies, wasting-age dynamics captured by child age dummies, and time trend effects captured by 5-year time dummies. GDP=Gross Domestic Product and GNI=Gross National Income.

Supplementary Table 6: Associations between moderate/severe wasting and morbidity symptoms, maternal underweight and child minimum dietary diversity

| Dependent variable                                    | (1)                                                             | (2)                                                                    |
|-------------------------------------------------------|-----------------------------------------------------------------|------------------------------------------------------------------------|
|                                                       | Full sample<br>Moderate or severe wasting<br>(WHZ< -2)<br>0-59m | Child diets sample<br>Moderate or severe wasting<br>(WHZ< -2)<br>6-35m |
| Diarrhea in past 2 weeks                              | 0.018***<br>(0.014, 0.022)                                      | 0.018***<br>(0.015, 0.020)                                             |
| Fever-only in past 2 weeks                            | 0.016***<br>(0.009, 0.023)                                      | 0.025***<br>(0.016, 0.035)                                             |
| Low maternal BMI                                      | 0.068***<br>(0.061, 0.075)                                      | 0.075***<br>(0.071, 0.080)                                             |
| Minimum diet diversity                                |                                                                 | -0.015***<br>(-0.022, -0.008)                                          |
| R-squared                                             | 0.072                                                           | 0.073                                                                  |
| DHS child, mother,<br>household effects? <sup>c</sup> | Yes                                                             | Yes                                                                    |
| Country fixed effects?                                | Yes                                                             | Yes                                                                    |
| Region-specific temporal<br>effects? <sup>d</sup>     | Yes                                                             | Yes                                                                    |

Notes:  $N = 1,174,216$  for the Full sample in regression (1) and  $N = 302,542$  for the Child diets sample in regression (2). Results in regression (1) are linear probability model coefficient point estimates of the association between diarrhea and fever-only in the past 2 weeks and Low maternal BMI on moderate or severe wasting, with 95% confidence intervals based on standard errors clustered at the country level reported in parentheses, with significance levels as follows: \*\*\*  $p < 0.01$ , \*\*  $p < 0.05$ , \*  $p < 0.10$ . All regressions control for country fixed effects, region-specific seasonality effects, wasting-age dynamics and trend effects. Regressions are weighted to be representative of the < 5 years population of children of all countries included in this DHS dataset. WHZ=Weight for height Z score.
